# Supplementary material for: Inhibitory properties of saponin from Eleocharis dulcis peel against α-glucosidase
Source: Royal Society of Chemistry journal article supplement (doi:10.1039/d1ra02198b), 2021-01-01
Supplement: d1ra02198b1.pdf [file d1ra02198b1.pdf]

## Electronic supplementary information

# Inhibitory properties of saponin from *Eleocharis dulcis* peel against $\alpha$ -glucosidase

Yipeng Gu<sup>1</sup>, Xiaomei Yang<sup>2</sup>, Chaojie Shang<sup>1</sup>, Truong Thi Phuong Thao<sup>1</sup>, and  
Tomoyuki Koyama<sup>1,\*</sup>

## Contents

### 1. Supplementary Figure

Figure S1. <sup>1</sup>H NMR (A) and HPLC (B) analysis of Fr.3 and Fr.4 separated from silica gel column.

Figure S2. The chromatogram of saponin fraction by Prep LC System with the recycle mode.

Figure S3. Sequence alignment of the amino acid residue between  $\alpha$ -glucosidase (GenBank: KZV11524.1) and isomaltase (PDB: 3AXI\_A) from *Saccharomyces cerevisiae*.

### 2. <sup>1</sup>H and <sup>13</sup>C NMR Chemical Shifts for Compounds 1-3

## 1. Supplementary Figure

**A**

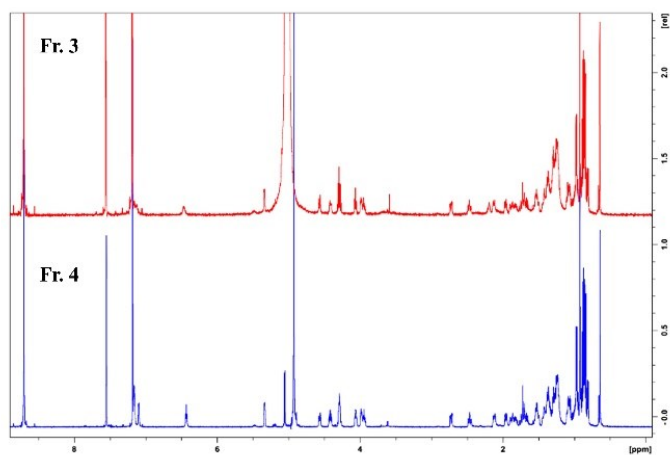

**B**

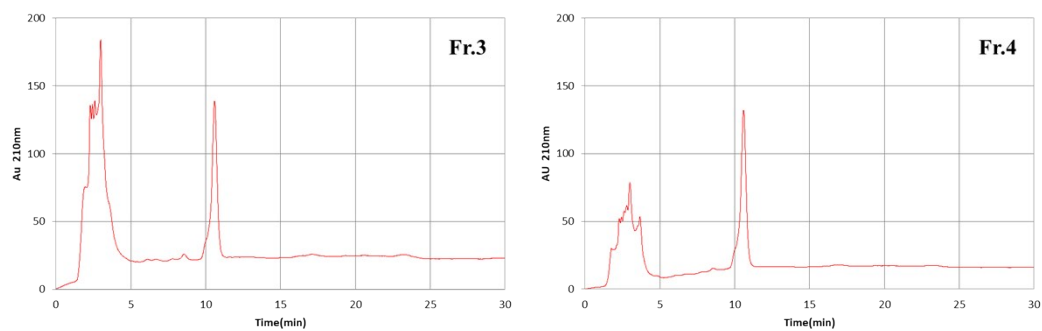

**Figure S1.**  $^1\text{H}$  NMR (A) and HPLC (B) analysis of Fr.3 and Fr.4 separated from silica gel column.

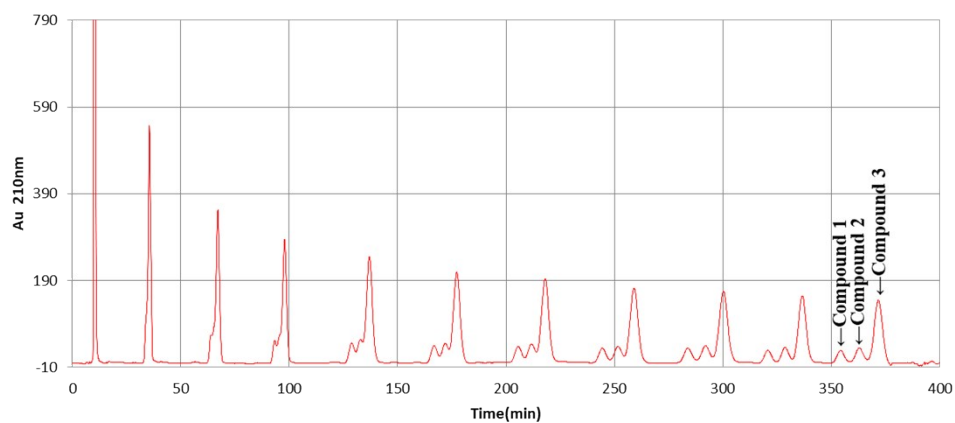

**Figure S2.** The chromatogram of saponin fraction by Prep LC System with the recycle mode.

| Score            | Expect                                                                           | Method                       | Identities                 | Positives      | Gaps           |            |      |     |
|------------------|----------------------------------------------------------------------------------|------------------------------|----------------------------|----------------|----------------|------------|------|-----|
| 1147 bits (2966) | 0.0                                                                              | Compositional matrix adjust. | 545/589 (93%)              | 568/589 (96%)  | 0/589 (0%)     |            |      |     |
| KZV11524.1       | MTISSAHPETEPKWWKEATVYQIYFASPKDSNDDGWDGDMKGI                                      | SKLEYIKELGVD                 | DAIWISPFYDSPQDDMGYDIANYEKV |                | 80             |            |      |     |
| 3AXI_A           | MTISSAHPETEPKWWKEATVYQIYFASPKDSNDDGWDGDMKGI                                      | SKLEYIKELGVD                 | DAIWISPFYDSPQDDMGYDIANYEKV |                | 80             |            |      |     |
| Consensus        | mtissahpetepkwwkeat yqiypasfkdsnddgwdmkgi skleyikelg daiwispfydspqddmgydianyekv  |                              |                            |                |                |            |      |     |
| KZV11524.1       | WPTYGTNEDCFALIEKTHKLGKRFITDLVINHCSEHEWFKESRSKTNPKRDWFFWRPPKGYIAEGKPIPPNNWKS YFG  |                              |                            |                | 160            |            |      |     |
| 3AXI_A           | WPTYGTNEDCFALIEKTHKLGKRFITDLVINHCSEHEWFKESRSKTNPKRDWFFWRPPKGYIAEGKPIPPNNWKS YFG  |                              |                            |                | 160            |            |      |     |
| Consensus        | wptygtnedcfaliekthklgmkrfitdlvinhcssehewfkesrsktnpkrdwffwrppkgydaegkpippnnwksyfg |                              |                            |                |                |            |      |     |
| KZV11524.1       | GSAWTFDEKTOEFYLRFCSTQPDLNWENEDCRKAIYESAVGYWLDHGVDGFRIDVGSLSYKVVGLPLAEV           | IIENSVWQS                    |                            |                | 240            |            |      |     |
| 3AXI_A           | GSAWTFDEKTOEFYLRFCSTQPDLNWENEDCRKAIYESAVGYWLDHGVDGFRIDVGSLSYKVVGLPLAEV           | IIENSVWQS                    |                            |                | 240            |            |      |     |
| Consensus        | gsawtfdektqefylrlfcstqpdlnwenedcrkaiyesavgywldhgvdgfridvgslyskvvglplap d n s wqs |                              |                            |                |                |            |      |     |
| KZV11524.1       | SDPYTLNGPRIHEFHQEMNQFIRNRVKDGREIMTVGMQHASDETKKLYTSASRHEL                         | ELFNFSHTDVGTSPLFRYNLVP       |                            |                | 320            |            |      |     |
| 3AXI_A           | SDPYTLNGPRIHEFHQEMNQFIRNRVKDGREIMTVGMQHASDETKKLYTSASRHEL                         | ELFNFSHTDVGTSPLFRYNLVP       |                            |                | 320            |            |      |     |
| Consensus        | sdpytlngprihefhqemnqfirnrvkdgreimtv gmqhasdetk lytsasrhel elfnfshtdvgtsplfrynlvp |                              |                            |                |                |            |      |     |
| KZV11524.1       | FELKDWKIAIAELFRYINGTDCWSTIYLENHDQPRSITRFGDDSPKNRV                                | SGKLLS                       | LLVSLTGTLYYQGOELGQINFK     |                | 400            |            |      |     |
| 3AXI_A           | FELKDWKIAIAELFRYINGTDCWSTIYLENHDQPRSITRFGDDSPKNRV                                | SGKLLS                       | LLVSLTGTLYYQGOELGQINFK     |                | 400            |            |      |     |
| Consensus        | felkdwkiaiaelfryingtdcwstiylenhdqprsitrfgddspknrv sgklls ll ltgtl yqqqelgqinfk   |                              |                            |                |                |            |      |     |
| KZV11524.1       | NWVEKYEDVEIRNNYNAIKEE                                                            | GENSEEMKKFLE                 | IALVSRDHARTPMW             | EPNAGFSGP      | KPWFYLN        | SFR        | GIN  | 480 |
| 3AXI_A           | NWVEKYEDVEIRNNYNAIKEE                                                            | GENSEEMKKFLE                 | IALVSRDHARTPMW             | EPNAGFSGP      | KPWFYLN        | SFR        | GIN  | 480 |
| Consensus        | nw vekyedveirnny ikee genseemkkfle ial srdhartpm w epnagfsgp kpwfyl n sfr gin    |                              |                            |                |                |            |      |     |
| KZV11524.1       | VEBEGRNDSVLA                                                                     | FWKFALE                      | FRRNHKDIEVGYDFE            | FIDLDNKKLFSFTK | YNNKTLFAALNFSS | IATDFRIPND | SSFK | 560 |
| 3AXI_A           | VEBEGRNDSVLA                                                                     | FWKFALE                      | FRRNHKDIEVGYDFE            | FIDLDNKKLFSFTK | YNNKTLFAALNFSS | IATDFRIPND | SSFK | 560 |
| Consensus        | ve e k svl fwk al frk hkdi vygydf fidldnkklsftk ynnktlfaalnffssiatdfripnd ssfk   |                              |                            |                |                |            |      |     |
| KZV11524.1       | LEFGNYPKKEVIASSRTLKPWEGRITYI                                                     |                              |                            |                |                |            |      | 588 |
| 3AXI_A           | LEFGNYPKKEVIASSRTLKPWEGRITYI                                                     |                              |                            |                |                |            |      | 588 |
| Consensus        | lefgnypkkev d assrtlkpwegriyi                                                    |                              |                            |                |                |            |      |     |

**Figure S3.** Sequence alignment of the amino acid residue between  $\alpha$ -glucosidase (GenBank: KZV11524.1) and isomaltase (PDB: 3AXI\_A) from *Saccharomyces cerevisiae*. ■: Identical sequence (homology=100%); ■: similar sequence (homology $\geq$ 50%); □: different sequence (homology=0%).

## 2. <sup>1</sup>H and <sup>13</sup>C NMR Chemical Shifts for Compounds 1-3

Compound 1: C<sub>35</sub>H<sub>58</sub>O<sub>6</sub>, white amorphous powder. <sup>1</sup>H NMR (600 MHz, Pyridine-*d*<sub>5</sub>): 5.34 (1H, dd, *J* = 4.8, 2.1 Hz, H-6), 5.19 (1H, dd, *J* = 15.2, 8.8 Hz, Ha-22), 4.58 (1H, ddd, *J* = 11.8, 5.7, 2.5 Hz, glc. Ha-6'), 4.43 (1H, m, glc. Hb-6'), 4.07 (1H, dd, *J* = 8.1, 3.5 Hz, glc. H-2'), 2.72 (1H, ddd, *J* = 13.4, 4.8, 2.3 Hz, Ha-4), 2.47 (1H, m, Hb-4), 1.91 (1H, dd, *J* = 12.5, 3.5 Hz, Ha-12), 0.89 (3H, d, *J* = 6.6 Hz, H-26), 0.84 (3H, d, *J* = 6.6 Hz, H-21), 1.05 (3H, d, *J* = 6.6 Hz, H-27), 0.86 (3H, t, *J* = 7.4 Hz, H-29), 0.92 (3H, s, H-19), 0.65 (3H, s, H-18); <sup>13</sup>C NMR (600 MHz, Pyridine-*d*<sub>5</sub>): 37.3 (C-1), 30.0 (C-2), 78.3 (C-3), 39.1 (C-4), 140.7 (C-5), 121.7 (C-6), 31.9 (C-7), 31.8 (C-8), 50.1 (C-9), 36.7 (C-10), 21.0 (C-11), 39.6 (C-12), 42.1 (C-13), 56.7 (C-14), 24.3 (C-15), 29.1 (C-16), 55.8 (C-17), 11.9 (C-18), 19.2 (C-19), 40.6 (C-20), 19.0 (C-21), 138.6 (C-22), 129.2 (C-23), 51.2 (C-24), 32.0 (C-25), 21.1 (C-26), 21.3 (C-27), 25.5 (C-28), 12.3 (C-29), 102.3 (C-1'), 75.1 (C-2'), 78.4 (C-3'), 71.5 (C-4'), 77.8 (C-5'), 62.6 (C-6').

Compound 2: C<sub>34</sub>H<sub>58</sub>O<sub>6</sub>, white amorphous powder. <sup>1</sup>H NMR (600 MHz, Pyridine-*d*<sub>5</sub>): 5.34 (1H, dd, *J* = 4.8, 2.1 Hz, H-6), 5.06 (1H, d, *J* = 7.7 Hz, glc. H-1'), 4.56 (1H, ddd, *J* = 11.8, 5.6, 2.5 Hz, glc. Ha-6'), 4.42 (1H, m, glc. Hb-6'), 4.06 (1H, dd, *J* = 8.5, 3.8 Hz, glc. H-2'), 2.73 (1H, ddd, *J* = 13.4, 4.8, 2.3 Hz, Ha-4), 2.47 (1H, m, Hb-4), 2.12, (1H, m, Ha-2), 1.96 (1H, dd, *J* = 12.7, 3.3 Hz, Ha-12), 0.95 (3H, d, *J* = 6.5 Hz, H-21), 0.92 (3H, s, H-19), 0.87 (3H, d, *J* = 6.8 Hz, H-27), 0.82 (3H, d, *J* = 6.8 Hz, H-26), 0.81 (3H, d, *J* = 6.5 Hz, H-28), 0.65 (3H, s, H-18); <sup>13</sup>C NMR (600 MHz, Pyridine-*d*<sub>5</sub>): 37.3 (C-1), 30.0 (C-2), 78.3 (C-3), 39.1 (C-4), 140.7 (C-5), 121.7 (C-6), 32.0 (C-7), 31.8 (C-8), 50.1 (C-9), 36.7 (C-10), 21.1 (C-11), 39.7 (C-12), 42.3 (C-13), 56.6 (C-14), 24.2 (C-15), 28.3 (C-16), 56.1 (C-17), 11.8 (C-18), 19.2 (C-19), 35.9 (C-20), 18.7 (C-21), 33.8 (C-22), 30.4 (C-23), 38.8 (C-24), 32.4 (C-25), 18.1 (C-26), 20.1 (C-27), 15.3 (C-28), 102.4 (C-1'), 75.1 (C-2'), 78.4 (C-3'), 71.5 (C-4'), 77.9 (C-5'), 62.6 (C-6').

Compound 3: C<sub>35</sub>H<sub>60</sub>O<sub>6</sub>, white amorphous powder. <sup>1</sup>H NMR (600 MHz, Pyridine-*d*<sub>5</sub>): 5.34 (1H, dd, *J* = 4.8, 2.1 Hz, H-6), 5.05 (1H, d, *J* = 7.7 Hz, glc. H-1'), 4.56 (1H, ddd, *J* = 11.8, 5.6, 2.5 Hz, glc. Ha-6'), 4.42 (1H, m, glc. Hb-6'), 4.06 (1H, dd, *J* = 8.0, 3.6

Hz, glc. H-2'), 2.72 (1H, ddd,  $J = 13.4, 4.8, 2.3$  Hz, Ha-4), 2.47 (1H, m, Hb-4), 1.96 (1H, dd,  $J = 12.5, 3.5$  Hz, Ha-12), 0.97 (3H, d,  $J = 6.5$  Hz, H-21), 0.92 (3H, s, H-19), 0.88 (3H, t,  $J = 7.4$  Hz, H-29), 0.87 (3H, d,  $J = 6.8$  Hz, H-27), 0.85 (3H, d,  $J = 6.8$  Hz, H-26), 0.65 (3H, s, H-18);  $^{13}\text{C}$  NMR (600 MHz, Pyridine- $d_5$ ): 37.3 (C-1), 30.0 (C-2), 78.3 (C-3), 39.1 (C-4), 140.7 (C-5), 121.7 (C-6), 31.9 (C-7), 31.8 (C-8), 50.1 (C-9), 36.7 (C-10), 21.0 (C-11), 39.7 (C-12), 42.3 (C-13), 56.6 (C-14), 24.2 (C-15), 28.3 (C-16), 56.0 (C-17), 11.7 (C-18), 19.2 (C-19), 36.1 (C-20), 18.9 (C-21), 33.9 (C-22), 26.1 (C-23), 45.3 (C-24), 29.2 (C-25), 18.7 (C-26), 19.7 (C-27), 23.1 (C-28), 11.9 (C-29), 102.4 (C-1'), 75.1 (C-2'), 78.4 (C-3'), 71.5 (C-4'), 77.9 (C-5'), 62.6 (C-6').
